# Supplementary material for: Epidemiology and Risk Factors for Resistance to Treatment of Kawasaki Disease in Cyprus.
Source: Research Square preprint supplement (doi:10.21203/rs.3.rs-1150812/v1), 2021-12-28
Supplement: Supplementary file 2 [file df3df5053f1b1420d56e74a4.docx]

**Additional file 2**

|  | **Without developing CAAs N (%)** | **CAAs N (%)** | **Total N (%)** | **P-value** |
| --- | --- | --- | --- | --- |
| **Age** |  |  |  | <0.001 |
| <6 months | 5 (5.0) | 8 (25.8) | 13 (9.9) |  |
| 6-12 months | 12 (12.0) | 6 (19.4) | 18 (13.7) |  |
| 12-59 months | 69 (69.0) | 10 (32.3) | 79 (60.3) |  |
| 60 months or older | 14 (14.0) | 7 (22.6) | 21 (16.0) |  |
| **Delayed treatment** |  |  |  | 0.567 |
| No | 85 (85.0) | 24 (77.4) | 109 (83.2) |  |
| Yes | 11 (11.0) | 5 (16.1) | 16 (12.2) |  |
| **Fever duration** |  |  |  | 0.241 |
| ≤14 days | 76 (76.0) | 19 (61.3) | 95 (72.5) |  |
| >14 days | 14 (14.0) | 7 (22.6) | 21 (16.0) |  |
| **Serum Sodium** |  |  |  | 0.238 |
| <135 | 42 (42.0) | 8 (25.8) | 50 (38.2) |  |
| ≥135 | 50 (50.0) | 21 (67.7) | 71 (54.2) |  |
| **Hb** |  |  |  | 0.242 |
| ≤10,2 | 37 (37.0) | 16 (51.6) | 53 (40.5) |  |
| >10,2 | 47 (47.0) | 13 (41.9) | 60 (45.8) |  |
| **Platelets max>900 000** |  |  |  | 0.721 |
| Yes | 20 (20.0) | 7 (22.6) | 27 (20.6) |  |
| No | 71 (71.0) | 20 (64.5) | 91 (69.5) |  |
| **Sex** |  |  |  | 0.757 |
| Female | 43 (43.0) | 15 (48.4) | 58 (44.3) |  |
| Male | 56 (56.0) | 16 (51.6) | 72 (55.0) |  |
| **Season** |  |  |  | 0.931 |
| Autumn | 15 (15.0) | 4 (12.9) | 19 (14.5) |  |
| Spring | 41 (41.0) | 13 (41.9) | 54 (41.2) |  |
| Summer | 18 (18.0) | 7 (22.6) | 25 (19.1) |  |
| Winter | 26 (26.0) | 7 (22.6) | 33 (25.2) |  |
